# Supplementary material for: Deformation of Filamentous Escherichia coli Cells in a Microfluidic Device: A New Technique to Study Cell Mechanics
Source: PubMed Central journal article supplement (PMC3879274; doi:10.1371/journal.pone.0083775), 2014-01-02
Supplement: pone.0083775.s012.pdf [file pone.0083775.s012.pdf]

**Deformation of Filamentous *Escherichia coli*  
Cells in a Microfluidic Device: a New Technique  
to Study Cell Mechanics - Supporting Table S1**

| Cell # | $L$ ( $\mu\text{m}$ ) | $\theta(0)$ (degrees) | $\theta(L)$ (degrees) | $EI$ ( $\times 10^{-20}$ $\text{Nm}^2$ ) |
|--------|-----------------------|-----------------------|-----------------------|------------------------------------------|
| 1      | $14.6 \pm 0.09$       | $7.4 \pm 0.5$         | $19.9 \pm 2.6$        | $2.4 \pm 0.98$                           |
| 2      | $15.1 \pm 0.08$       | $11.4 \pm 1$          | $21.4 \pm 2.2$        | $3.5 \pm 1.1$                            |
| 3      | $15.3 \pm 0.09$       | $18.4 \pm 0.9$        | $39.5 \pm 4.8$        | $1.4 \pm 0.74$                           |
| 4      | $17.2 \pm 0.14$       | $14.2 \pm 1.1$        | $25.0 \pm 2.7$        | $4.6 \pm 1.86$                           |
| 5      | $17.9 \pm 0.11$       | $24.6 \pm 1.4$        | $56.4 \pm 3.9$        | $1.0 \pm 0.41$                           |
| 6      | $19.1 \pm 0.17$       | $22.3 \pm 2.0$        | $44.7 \pm 5.1$        | $2.3 \pm 1.17$                           |
| 7      | $19.6 \pm 0.14$       | $27.7 \pm 1.9$        | $46.5 \pm 4.5$        | $2.8 \pm 1.43$                           |
| 8      | $19.4 \pm 0.13$       | $18.9 \pm 1.6$        | $34.0 \pm 2.5$        | $4.3 \pm 0.85$                           |
| 9      | $19.8 \pm 0.15$       | $16.7 \pm 1.6$        | $41.2 \pm 3.5$        | $2.5 \pm 0.69$                           |
| 10     | $20.0 \pm 0.18$       | $23.3 \pm 1.9$        | $44.4 \pm 5.2$        | $2.8 \pm 1.55$                           |
| 11     | $20.1 \pm 0.12$       | $19.7 \pm 1.7$        | $32.3 \pm 4.3$        | $5.8 \pm 3.13$                           |
| 12     | $20.6 \pm 0.14$       | $23.5 \pm 1.2$        | $37.7 \pm 3.7$        | $5.1 \pm 2.44$                           |
| 13     | $20.7 \pm 0.16$       | $30.0 \pm 2.0$        | $48.5 \pm 4.5$        | $3.3 \pm 1.66$                           |
| 14     | $21.2 \pm 0.13$       | $25.7 \pm 1.7$        | $39.4 \pm 5.3$        | $5.7 \pm 4.2$                            |
| 15     | $21.2 \pm 0.23$       | $27.4 \pm 4.4$        | $56.6 \pm 4.3$        | $1.9 \pm 0.53$                           |
| 16     | $21.9 \pm 0.15$       | $22.8 \pm 2.1$        | $44.4 \pm 3.0$        | $3.6 \pm 0.84$                           |
| 17     | $22.3 \pm 0.17$       | $21.6 \pm 1.6$        | $41.8 \pm 4.0$        | $4.3 \pm 1.65$                           |
| 18     | $22.9 \pm 0.21$       | $25.6 \pm 2.2$        | $62.3 \pm 6.9$        | $1.6 \pm 1.52$                           |
| 19     | $22.3 \pm 0.17$       | $13.8 \pm 1.1$        | $28.3 \pm 1.9$        | $7.2 \pm 1.29$                           |
| 20     | $22.9 \pm 0.19$       | $28.8 \pm 2.3$        | $52.5 \pm 4.7$        | $3.3 \pm 1.63$                           |
| 21     | $23.8 \pm 0.22$       | $23.6 \pm 2.8$        | $54.2 \pm 3.1$        | $2.8 \pm 0.57$                           |
| 22     | $24.4 \pm 0.18$       | $23.5 \pm 1.4$        | $52.2 \pm 5.4$        | $3.3 \pm 1.91$                           |
| 23     | $24.9 \pm 0.19$       | $23.4 \pm 1.7$        | $61.3 \pm 4.0$        | $2.1 \pm 0.86$                           |
| 24     | $25.5 \pm 0.15$       | $14.2 \pm 0.9$        | $44.5 \pm 5.9$        | $4.2 \pm 2.36$                           |
| 25     | $27.1 \pm 0.33$       | $26.0 \pm 2.5$        | $60.8 \pm 4.9$        | $2.9 \pm 1.57$                           |
| 26     | $27.2 \pm 0.21$       | $19.8 \pm 1.3$        | $69.2 \pm 5.0$        | $1.7 \pm 1.19$                           |
| 27     | $27.8 \pm 0.24$       | $15.1 \pm 1.5$        | $53.1 \pm 3.4$        | $3.8 \pm 0.99$                           |
| 28     | $28.7 \pm 0.26$       | $23.9 \pm 2.1$        | $61.7 \pm 4.4$        | $3.3 \pm 1.5$                            |
| 29     | $29.5 \pm 0.23$       | $17.8 \pm 1.8$        | $54.6 \pm 8.0$        | $4.5 \pm 3.92$                           |
| 30     | $31.7 \pm 0.33$       | $20.7 \pm 1.6$        | $66.7 \pm 4.0$        | $3.2 \pm 1.44$                           |
| 31     | $32.4 \pm 0.24$       | $17.9 \pm 0.9$        | $63.6 \pm 6.3$        | $3.8 \pm 3.0$                            |

Table S1:
